# Supplementary material for: Molecular marker identification, antioxidant, antinociceptive, and anti-inflammatory responsiveness of malonic acid capped silver nanoparticle
Source: Frontiers journal article supplement (doi:10.3389/fphar.2023.1319613), 2024-01-31
Supplement: Data_Sheet_1.PDF [file Data_Sheet_1.PDF]

## **Supplementary files**

**S1:** Scheme 2. The synthesis mechanism of silver nanoparticles by using C-AgNPs.

**S2:** Brine Shrimp Lethality bioassay.

**S3:** Carrageenan-induced paw edema method.

**S4:** Tail Flick Method.

**S5:** list of abbreviations

**S6:** Ethical approval letters.

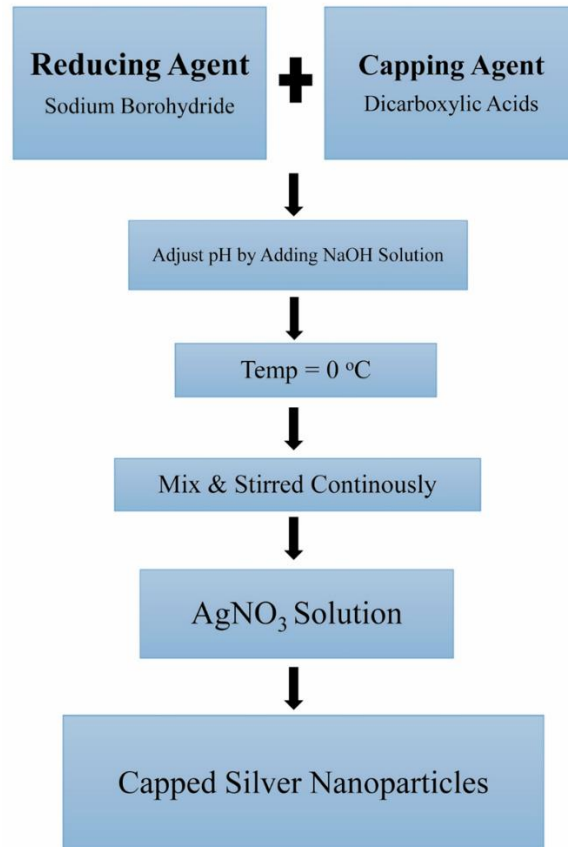

Scheme 2. The synthesis mechanism of silver nanoparticles by using C AgNPs

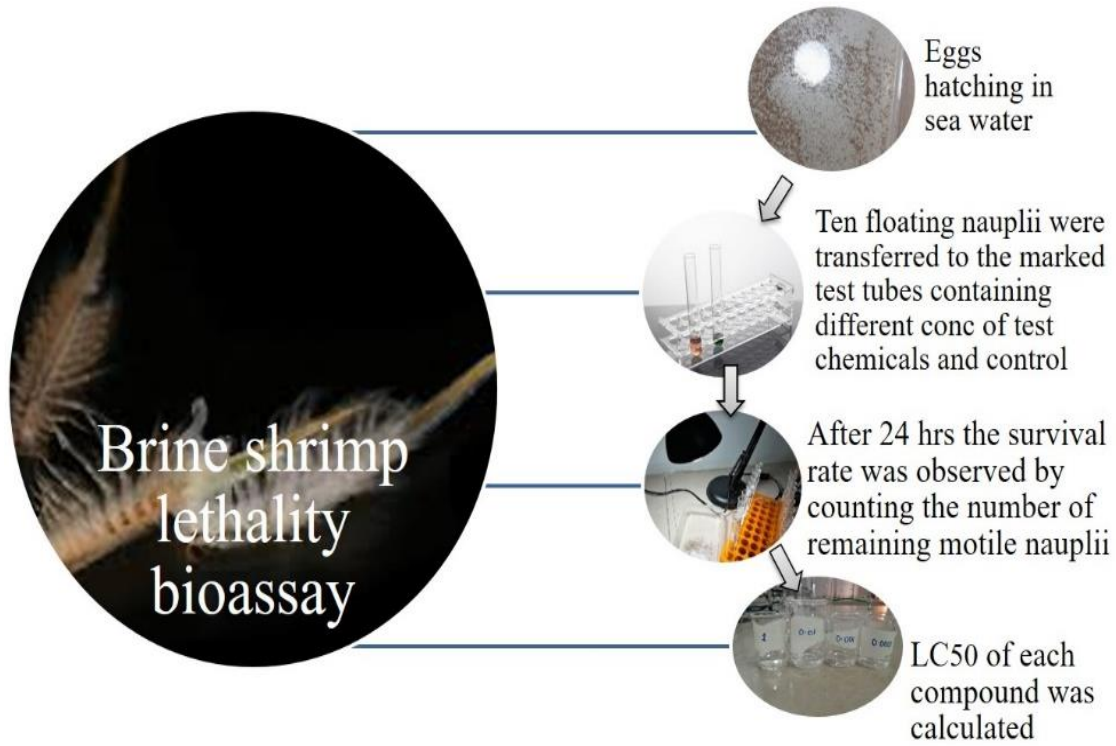

**S2: Brine Shrimp Lethality bioassay**

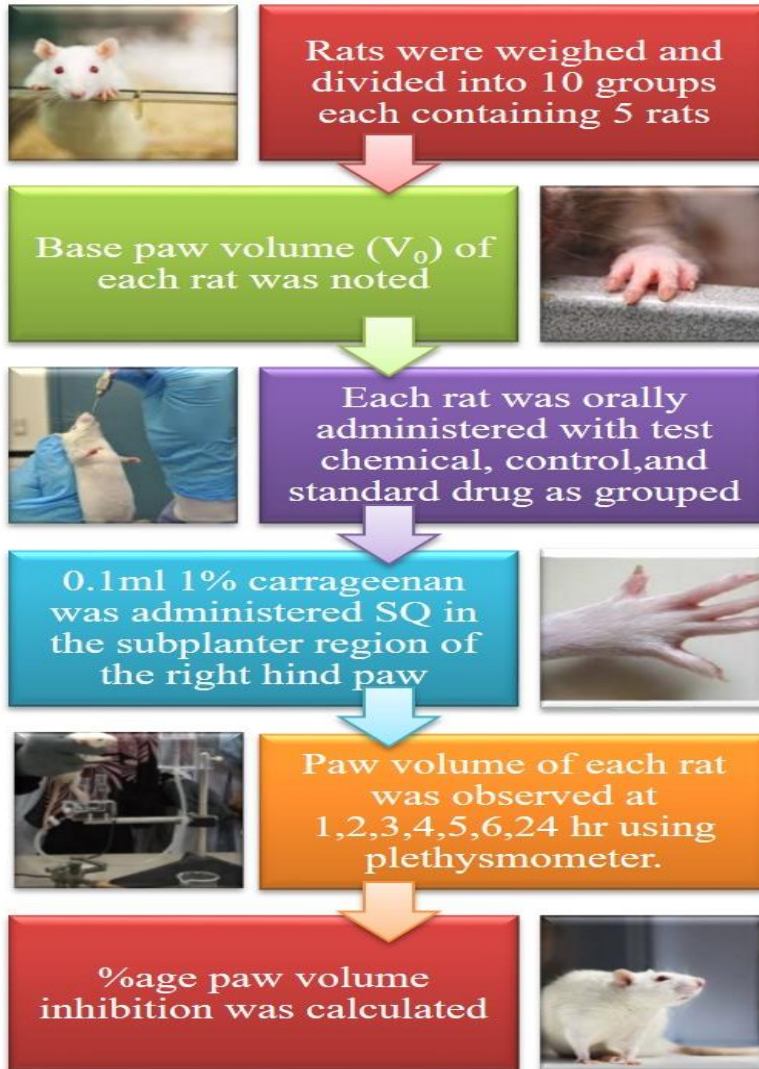

**S3: Carrageenan induced paw edema method**

# Tail flick method

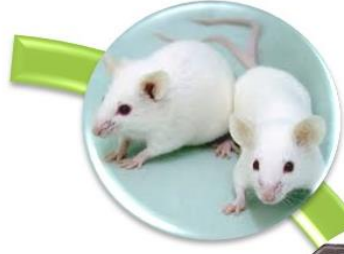

Mice were weighed and divided into different groups

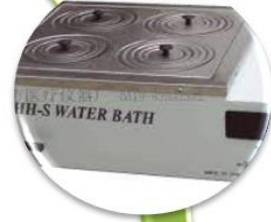

Water bath was maintained at the temperature of 50-52°C and base response was noted

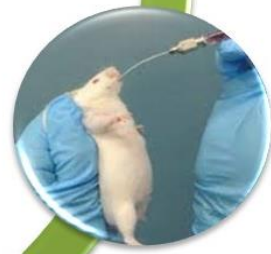

Drug was orally administered and then tail flick response at 15, 30,60,90, and 120 mins was observed

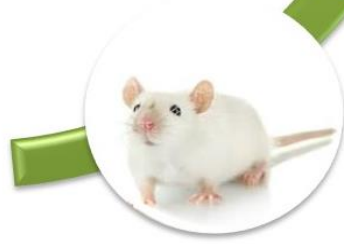

Percentage protection of each mice was calculated

## S4: Tail Flick Method

## S5: LIST OF ABBREVIATIONS

|                   |                                                             |
|-------------------|-------------------------------------------------------------|
| °C                | Degree Celcius                                              |
| µg                | Microgram                                                   |
| µl                | Microliter                                                  |
| µl                | Microliter                                                  |
| µM                | Micromolar                                                  |
| Ag                | Silver                                                      |
| AgNO <sub>3</sub> | Silver Nitrate                                              |
| AgNPs             | Silver Nanoparticles                                        |
| AgNPs (C)         | Sodium Borohydride Malonic acid capped Silver Nanoparticles |
| ANOVA             | Analysis of variance                                        |
| COX-2             | Cyclooxygenase 2 enzyme                                     |
| DLS               | Dynamic Light Scattering                                    |
| DNA               | Deoxyribonucleic Acid                                       |
| DPPH              | 2, 2 diphenyl-1-picrylhydrazyl                              |
| FT-IR             | Fourier Transform Infrared Spectroscopy                     |
| g                 | Gram                                                        |
| GI                | Gastrointestinal                                            |
| Gram +ve          | Gram-positive                                               |
| Gram -ve          | Gram-negative                                               |
| H&E               | Hematoxylin and Eosin                                       |
| IC <sub>50</sub>  | Half maximal inhibitory concentration                       |
| IL-6              | Interleukin-6                                               |
| IP                | Intraperitoneal                                             |

|                         |                                                       |
|-------------------------|-------------------------------------------------------|
| LC <sub>50</sub>        | Lethal Concentration 50                               |
| LD <sub>50</sub>        | Lethal Dose 50                                        |
| M                       | Molar                                                 |
| Max                     | Maximum                                               |
| Mg                      | Milligram                                             |
| MIC                     | Minimum Effective Concentration                       |
| Min                     | Minimum                                               |
| ml                      | Milliliter                                            |
| mM                      | Millimolar                                            |
| NaBH <sub>4</sub> AgNPs | Sodium Borohydride Silver Nanoparticles               |
| NFκB                    | Nuclear Factor Kappa B                                |
| Nm                      | Nanometer                                             |
| NO                      | Nitric Oxide                                          |
| NSAIDs                  | Non-Steroidal Anti-Inflammatory Drugs                 |
| OECD                    | Organization of Economic Co-operation and Development |
| PBS                     | Phosphate Buffer Saline                               |
| PGE <sub>2</sub>        | Prostaglandin E <sub>2</sub>                          |
| pH                      | Potential of Hydrogen                                 |
| RM ANOVA                | Repeated Measure Analysis of Variance                 |
| ROS                     | Reactive Oxygen Species                               |
| RT-PCR                  | Real-Time Polymerase Chain Reaction                   |
| SD                      | Standard Deviation                                    |
| SEM                     | Scanning Electron Microscope                          |
| SOD                     | Superoxide Dismutase                                  |
| SPSS                    | Statistical Package for Social Sciences               |

|               |                                        |
|---------------|----------------------------------------|
| Std           | Standard                               |
| TAC           | Total Antioxidant Capacity             |
| TCA           | Trichloroacetic Acid                   |
| TEM           | Transmission Electron Microscopy       |
| TNF- $\alpha$ | Tumor Necrosis Factor alpha            |
| TSC AgNPs     | Trisodium citrate Silver Nanoparticles |
| UV visible    | Ultraviolet-visible                    |
| VS            | Vincristine Sulfate                    |



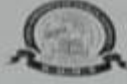

**Dow University of Health Sciences**  
**Institutional Review Board (IRB)**

Ref: IRB-2698/DUHS/Approval/2022/1037

Dated: 22<sup>nd</sup> September, 2022

**Ms. Tehrim Fatima**  
Enr # 15/2020/501  
M.Phil Candidate,  
Discipline of Pharmacology,  
Dow College of Pharmacy  
Dow University of Health Sciences.

Subject: Institutional Review Board's approval for a research proposal.

**Title of Study:** Evaluation of anti-inflammatory, antinociceptive and antioxidant activities of malonic acid capped silver nanoparticles

**Enrolment Duration:** 16-Nov-2020 to 15-Nov-2024

**CRR Due Date:** 21<sup>st</sup> September, 2023

Dear Ms. Tehrim Fatima,

Thank you for submitting the above mentioned study proposal. I am pleased to inform you that the IRB-DUHS has reviewed this proposal in its **185<sup>th</sup> meeting** held on **03<sup>rd</sup> September, 2022** and gives approval for a period of one year to conduct this study. You can now proceed for BASR approval.

It should be noted that thesis must be submitted and get BASR approval after successful defense on or before 15-Nov-2024. Any change in the protocol or extension in the period of study should be notified to the board for approval. Interim report on progress of study should be submitted to IRB from time to time.

**Prof. Rashid Qadeer**  
Professor of Medicine Unit-II  
Chairperson Institutional Review Board,  
Civil Hospital Karachi &  
Dow University of Health Sciences,  
Karachi

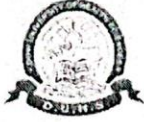

**DOW UNIVERSITY OF HEALTH SCIENCES**  
**BOARD OF ADVANCED STUDIES & RESEARCH (BASR)**

Ref. No: DUHS/BASR/2022/12-78

BASR Meeting No.69  
November 28, 2022

Dated: 20<sup>th</sup> Dec, 2022

**SUBJECT: APPROVAL OF RESEARCH SYNOPSIS**

Reference to your application for approval of research synopsis for the thesis of **Master of Philosophy (Pharmacology)**

This is to inform that your request for approval of research synopsis for the thesis of **MPhil (Pharmacology)** has been approved by the Board of Advanced Studies and Research (BASR), Dow University of Health Sciences w.e.f. **28-11-2022**. You will be working at Dow College of Pharmacy (DCOP), on the following research topic under the supervision of **Dr. Hina Abrar** and co-supervision **Prof. Dr. Noor Jahan** and **Dr. Sana Shamim**.

**TOPIC**

**"Evaluation of Anti-Inflammatory, Antinociceptive and, Antioxidant Activities of Malonic Acid Capped Silver Nanoparticles"**

You are therefore required to complete the formalities of research work and submit the thesis for **MPhil (Pharmacology)** program within maximum allowed duration as per DUHS policy.

If any forgery/fabrication/falsification/plagiarism is found in your dataset/research/thesis, as per DUHS policy you will be expelled from **MPhil (Pharmacology)** program.

**Prof. Kashif Shafique**  
MBBS (Dow), MPH (Glasgow), PhD (Glasgow)  
Secretary, Board of Advanced Studies and Research  
Dow University of Health Sciences, Karachi.

**Tehrim Fatima**  
Enr # 15/2020/501  
M.Phil. (Pharmacology) Candidate  
Dow College of Pharmacy (DCOP),  
Dow University of Health Sciences.

Copy for information to:

- Program Director: **DCOP**
- Supervisor: **Dr. Hina Abrar**, Assistant Professor, Dept. of Pharmacology, DCOP - DUHS
- Co-Supervisor: **Prof. Dr. Noor Jahan**, Professor, Dean and Program Director of Post Graduate Studies, DCOP –DUHS.
- Co-Supervisor: **Dr. Sana Shamim**, Assistant Professor, Department of Pharmaceutical Chemistry, DCOP,

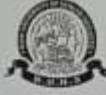

**DOW UNIVERSITY OF HEALTH SCIENCES**  
**ETHICAL REVIEW BOARD FOR ANIMAL**  
**RESEARCH & ETHICS**

REF: AR,IRB-21/DUHS/Approval/2022/44

Date: July 27th, 2022

Tehrim Fatima  
M.Phil Scholar  
Dow College of Pharmacy  
Dow University of Health Sciences

**Subject: Ethical Review Board for Animal Research & Ethics Approval for Research Proposal**

**Title of Study: Evaluation of anti-inflammatory, antinociceptive and antioxidant activities of malonic acid capped silver nanoparticles**

Tehrim Fatima

Thank you for submitting the above-mentioned study proposal. I am pleased to inform you that ERB for Animal Research & Ethics, DUHS has reviewed this research proposal in its 25th meeting held on July 19th, 2022 and gives approval to conduct procedure incorporating animals as mentioned in study design for a period of one year.

Any changes in the animal-based procedure/protocol or extension in the duration of study should be notified to board for the approval. Progress report and concluding reports should be submitted to committee.

**Prof Dr. Zeba Haque**  
Professor of Biochemistry  
Dow International Medical College  
Chairperson,  
Ethical Review Board for Animal Research & Ethics  
Dow University of Health Sciences  
Karachi

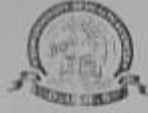

**DOW UNIVERSITY OF HEALTH SCIENCES  
SCIENTIFIC COMMITTEE**

Ref. No: DUHS/SC/2022/- 172  
Date: 21<sup>st</sup> May, 2022

Ms. Tehrim Fatima  
Enr # 15/2020/501  
M.Phil Candidate,  
Discipline of Pharmacology,  
Dow College of Pharmacy,  
Dow University of Health Sciences.

**Subject:** Approval of M.Phil (Pharmacology) Candidate's Synopsis by Scientific Committee

**Enrolment Duration:** 16-Nov-2020 to 15-Nov-2024

Dear Ms. Tehrim Fatima,

I would like to inform you that your synopsis titled "Evaluation of anti-inflammatory, antinociceptive and antioxidant activities of malonic acid capped silver nanoparticles" was presented in 118<sup>th</sup> Scientific Committee Meeting for review held on April 29, 2022. The synopsis was revised and resubmitted with the marked corrections. Therefore, it has been approved by the Scientific Committee of Dow University of Health Sciences for M.Phil (Pharmacology) research. You can now proceed for further approvals from IRB and BASR.

It should be noted that thesis must be submitted and get BASR approval after successful defense on or before 15<sup>th</sup> November 2024.

Thanks and regards,

Yours Sincerely,

**Prof. Kashif Shafique**  
MBBS (Dow), MPH (Glasgow), PhD (Glasgow)  
Secretary, Scientific Committee,  
Professor (Public Health) & Principal, School of Public Health,  
Director, ORIC,  
Dow University of Health Sciences, Karachi, Pakistan.

Copy to:

1. Record file
2. Secretary, BASR: Board of Advanced Studies and Research.
3. Program Director & Co-Supervisor: Prof. Dr. Noor Jahan, Dean, Dept. of Pharmacology, DCOP, DUHS.
4. Supervisor: Dr. Hina Abrar, Asst. Prof., Dept. of Pharmacology, DCOP, DUHS.
5. Co-Supervisor: Dr. Sana Shamim, Asst. Prof., Dept. of Pharmaceutical Chemistry, DCOP, DUHS.
